# Supplementary material for: Managing Obesity in Lockdown: Survey of Health Behaviors and Telemedicine
Source: MDPI journal article supplement (doi:10.3390/nu13041359), 2021-04-19
Supplement: s1 [file s1]

## **Translated Pertinent Survey Questions**

### **Informed consent:**

1. I consent voluntarily to be a participant in this study, and I am aware of my right to stop my participation at any time without need for an explanation
  - a. Yes
  - b. No

### **Personal details**

2. Age :
3. Gender:
  - a. Male
  - b. Female
  - c. I would rather not say
4. Name of city or town in which you reside:
5. Please indicate your weight in kg as measured before the COVID-19 outbreak (skip if unknown):
6. Please indicate your current weight in kg:
7. Employment during lockdown:
  - a. I did not work before and I do not work at the present
  - b. I worked before and I am not working at the present
  - c. I am working from home
  - d. I am an essential worker working outside the home
  - e. I am a student/soldier
  - f. I am retired
8. Please mark the statements that apply to you:
  - a. I received medications for weight management during the COVID-19 outbreak
  - b. I underwent endoscopic sleeve gastropasty
  - c. I underwent bariatric surgery in the past year
  - d. I underwent bariatric surgery over a year ago
  - e. None of the above

### **Diet and physical activity**

1. I feel during this period I have been eating:
  - a. More than usual
  - b. Less than usual
  - c. No change
2. During this period, I have been eating processed snacks (sweet/savory):
  - a. More than usual
  - b. Less than usual
  - c. No change
3. During this period, I have been eating fruits and vegetables:
  - a. More than usual
  - b. Less than usual
  - c. No change
4. During the COVID-19 outbreak (mark all statements that apply to you):
  - a. I ate more homemade food
  - b. I ate more fast food
  - c. I ate less homemade food
  - d. I ate less fast food
  - e. There was no change in my homemade food consumption
  - f. There was no change in my fast food consumption
5. During this period:
  - a. I adhere more to having organized and planned meals throughout the day
  - b. I adhere less to having organized and planned meals throughout the day
  - c. There is no change in my adherence to organized and planned meals throughout the day
6. Which of the following statements best describes your eating habits during the COVID-19 outbreak (mark all statements that apply to you):
  - a. Eating more meals at the table
  - b. Eating less meals at the table
  - c. I live by myself
  - d. Eating more often with household members

- e. Eating less often with household members
7. Before the COVID-19 outbreak: How much time (in hours) per week did you dedicate to physical activity?
- a. < 1
  - b. 2
  - c. 3
  - d. 4
  - e. 5
  - f. > 5
8. During the COVID-19 outbreak: How much time (in hours per week) did you dedicate to physical activity?
- a. < 1
  - b. 2
  - c. 3
  - d. 4
  - e. > 5

### **Sleep and Mood**

1. How did the COVID-19 crisis affect your sleeping hours?
- a. I sleep more hours on average every night as compared to my previous routine
  - b. I sleep less hours on average every night as compare to my previous routine
  - c. There is no change in number of hours I sleep at night
2. Was there nighttime eating (at late hours or at a time that you are supposed to be asleep) before the current period?
- a. Yes
  - b. No
  - c. Sometimes
  - d. I do not know
3. Is there nighttime eating (at late hours or at a time that you are supposed to be asleep) currently?
- a. Yes
  - b. No
  - c. Sometimes

- d. I do not know
- 4. How has this period affected your mood?
  - a. My mood improved
  - b. My mood worsened
  - c. There is no change in my mood
  - d. I do not know

### **Virtual Care**

- 1. Do you utilize the virtual care services available in our clinic?
  - a. Yes, since the COVID-19 outbreak I have been receiving virtual consultations
  - b. Yes, and I received virtual care prior to the COVID-19 outbreak as well
  - c. I received virtual care prior to COVID-19 and I am not using it at the present
  - d. No
- 2. I utilized virtual care for the following types of consultations (mark all applicable selections):
  - a. Medical
  - b. Dietary
  - c. Psychological
- 3. Do you believe that you will continue to utilize the dietary online care after the COVID-19 crisis ends?
  - a. Yes, certainly
  - b. Yes, in part
  - c. Not at all
  - d. I do not know
